1 RESEARCH

2 **Simplicial and Topological Descriptions of Human Brain Dynamics**

3 **Jacob Billings**<sup>1,2</sup>, **Manish Sagar**<sup>3</sup>, **Jaroslav Hlinka**<sup>2</sup>, **Sheila Keilholz**<sup>4</sup>, **Giovanni Petri**<sup>1,5</sup>

4 <sup>1</sup>Mathematics and Complex Systems Research Area, ISI Foundation, Turin, Italy

5 <sup>2</sup>Institute of Computer Science of the Czech Academy of Sciences, Prague, Czech Republic

6 <sup>3</sup>Department of Psychiatry & Behavioral Sciences, Stanford University School of Medicine, Stanford, USA

7 <sup>4</sup>Coulter Department of Biomedical Engineering, Emory University and Georgia Institute of Technology, Atlanta, USA

8 <sup>5</sup>ISI Global Science Foundation, New York, USA

9 **Keywords:** functional connectivity, time-varying functional connectivity, topological data analysis, persistent homology

**ABSTRACT**

10 Whereas brain imaging tools like functional Magnetic Resonance Imaging (fMRI) afford  
11 measurements of whole-brain activity, it remains unclear how best to interpret patterns found amid the  
12 data's apparent self-organization. To clarify how patterns of brain activity support brain function, one  
13 might identify metric spaces that optimally distinguish brain states across experimentally defined  
14 conditions. Therefore, the present study considers the relative capacities of several metric spaces to  
15 disambiguate experimentally defined brain states. One fundamental metric space interprets fMRI data  
16 topographically, i.e., as the vector of amplitudes of a multivariate signal, changing with time. Another  
17 perspective considers the condition-dependency of the brain's Functional Connectivity (FC), i.e., the  
18 similarity matrix computed across the variables of a multivariate signal. More recently, metric spaces that  
19 think of the data topologically, e.g., as an abstract geometric object, have become available. In the  
20 abstract, uncertainty prevails regarding the distortions imposed by the mode of measurement upon the  
21 object under study. Features that are invariant under continuous deformations, such as rotation and

22 inflation, constitute the features of topological data analysis. While there are strengths and weaknesses of  
23 each metric space, we find that metric spaces that track topological features are optimal descriptors of the  
24 brain's experimentally defined states.

## AUTHOR SUMMARY

25 Time-Varying Functional Connectivity (TVFC) leverages brain imaging data to interpret brain function  
26 as time-varying patterns of coordinating activity among brain regions. While many questions remain  
27 regarding the organizing principles through which brain function emerges from multi-regional  
28 interactions, advances in the mathematics of Topological Data Analysis (TDA) may provide new insights  
29 into the brain's functional self-organization. One tool from TDA, "persistent homology", observes the  
30 occurrence and persistence of  $n$ -dimensional holes in a sequence of simplicial complexes extracted from  
31 a weighted graph. The occurrence of such holes within the TVFC graph may indicate preferred routes of  
32 information flow among brain regions. In the present study, we compare the use of persistence homology  
33 versus more traditional metrics at the task of segmenting brain states that differ across experimental  
34 conditions. We find that the structures identified by persistence homology more accurately segment the  
35 stimuli, more accurately segment high versus low performance levels under common stimuli, and  
36 generalize better across volunteers. These findings support the topological interpretation of brain  
37 dynamics.

## INTRODUCTION

38 One of the perennial questions in neuroscience concerns how neuronal signaling generates time-varying  
39 experiences. One foundation from which to address this question asserts that brain function emerges  
40 from neuronal communication within the context of multiscale neuronal networks. Having access to  
41 high-quality whole-brain imaging data, the field of Time-Varying Functional Connectivity (TVFC) (or  
42 chronnectomics (Calhoun, Miller, Pearlson, & Adalı, 2014)) offers an empirical approach to  
43 characterizing time-varying patterns of mesoscopic neuronal communication (Hansen, Battaglia,  
44 Spiegler, Deco, & Jirsa, 2015; Hutchison et al., 2013).

45 Early computational analysis of brain imaging data observed changes in vectors describing brain  
46 **topography** across conditions. FC instead defines a **geometry** among brain regions by computing  
47 pairwise similarities from their long-term spontaneous activity measures (Biswal, Zerrin Yetkin,  
48 Haughton, & Hyde, 1995). While often the similarity between regions is calculated using the Pearson  
49 correlation among spontaneous neuroimaging signals (Biswal et al., 1995; Buckner, 2011; Stoodley,  
50 Valera, & Schmahmann, 2010), in general, the idea of brain connectivity can apply to other methods of  
51 computing pairwise edges between nodes in the brain. For instance, the present study defines TVFC  
52 using instantaneous coherence.

53 But is the overt geometry of brain imaging data an optimal set of features through which to view and  
54 compare brain dynamics? Or, does FC geometry tend to be an idiosyncratic and volunteer-specific  
55 descriptor of the brain's state (Finn et al., 2015)? An alternative perspective observes that an FC **graph**  
56 may be treated as a **network**. From here, the analyst may compute graph-theoretic summaries such as  
57 centrality, strength, small-worldness, etc. (Bullmore & Sporns, 2009; Farahani, Karwowski, & Lighthall,  
58 2019). However, it is not clear that network properties become clearer when segmenting the brain into  
59 more parcels. Rather, the observation of important network properties may require a precise parcellation  
60 schema (Gordon et al., 2016).

61 A more complete picture of neuronal dynamics should account for the brain's differential  
62 establishment, and dissolution, of functionally connected ensembles of brain regions through time. One  
63 way to gain this perspective is to consider data as an approximate sampling of an underlying, typically  
64 low-dimensional, geometric object, that is, as a **topological space**. In this framework, we may describe  
65 the potentially many-body interactions between points or regions of interest using **simplices**. In the  
66 simplest and most abstract definition, a  $k$ -simplex  $\sigma = [p_0, p_1, \dots, p_k]$  is a set of  $(k+1)$  points  $p_i$  with an  
67 ordering. The **topology** of a space is defined by collections of simplices, called **simplicial complexes**,  
68 that are closed under intersection (i.e.  $X$  is a simplicial complex if  $\forall \sigma, \sigma' \in X$ , then also  $\sigma \cap \sigma' \in X$  ).  
69 Disconnected holes and cavities are described by the **homology** groups  $H_k$  of the simplicial complex:  $H_0$   
70 describes connected components of the complex,  $H_1$  its one dimensional cycles,  $H_2$  three-dimensional  
71 cavities, and so on for higher  $k$ s.

72 Topological Data Analysis (TDA) attempts to reconstruct the data's underlying abstract topological  
73 space by quantifying the presence and persistence of homological features across different scales (e.g.

74 distances between points, or intensity of correlation between different regions in FC graphs). Such  
75 features may include connected regions of a topological space, and its holes in various dimensions, from  
76 one-dimensional cycles to higher-dimensional cavities (Battiston et al., 2020; Phinyomark,  
77 Ibanez-Marcelo, & Petri, 2017). TDA has been described as “exactly that branch of mathematics which  
78 deals with qualitative geometric information” (Carlsson, 2009). In practice, one does not focus on a  
79 single complex  $X$  but rather on a **filtration**  $\mathbb{X} = [X_0, X_1, X_2, \dots, X_n]$ , a sequence of nested simplicial  
80 complexes, such that  $X_i \in X_{i+1}$ , which approximates the topological structure at different scales. In this  
81 case, the analogues of homological groups are persistent homological groups, which not only capture the  
82 presence or absence of a hole, but also at what scale it appears and at what scale—if any—it disappears.  
83 In this way, persistent homology generates topological summaries, called persistence diagrams, that can  
84 then be used to compute topologically-informed distances between datasets (see Methods).

85 Re-thinking the more traditional brain dynamics metric spaces from the perspective of topology;  
86 values for nodal activity, edge weight, degree strength, etc., are properties that decorate  $k$ -simplices.  
87 Thus, we can consider more traditional metrics as adopting a ‘simplicial approach,’ while a ‘topological  
88 approach’ focuses on topological features associated to sequences of simplicial complexes. To compare  
89 simplicial and topological spaces of brain dynamics, we leverage pre-existing rest and task fMRI data  
90 from 18 volunteers (Gonzalez-Castillo et al., 2015). We compare instantaneous brain images using each  
91 of 6 metric spaces—3 simplicial metrics, and 3 topological metrics. Metric spaces are embedded onto  
92 2-dimensions to facilitate statistical tests relating clusters of brain images with common experimental  
93 conditions (for more details, see figure 1 and Methods). In part A of figure 2, we report an instance of the  
94 embeddings output from the six brain dynamics metrics spaces, that is, the metric space from differential  
95 *node* topography, differential *edge* geometry, differential degree *strength*, and also the three topological  
96 distances between homology groups in dimensions 1, 2, and 3 (the homology groups  $H_0$ ,  $H_1$ , and  $H_2$ ).  
97 Points often form dense regions associated to certain experimental stimuli. After 256 bootstrap samples  
98 of the embedding process, we find that the topological approach excels at distinguishing experimentally  
99 distinct brain states.

## RESULTS

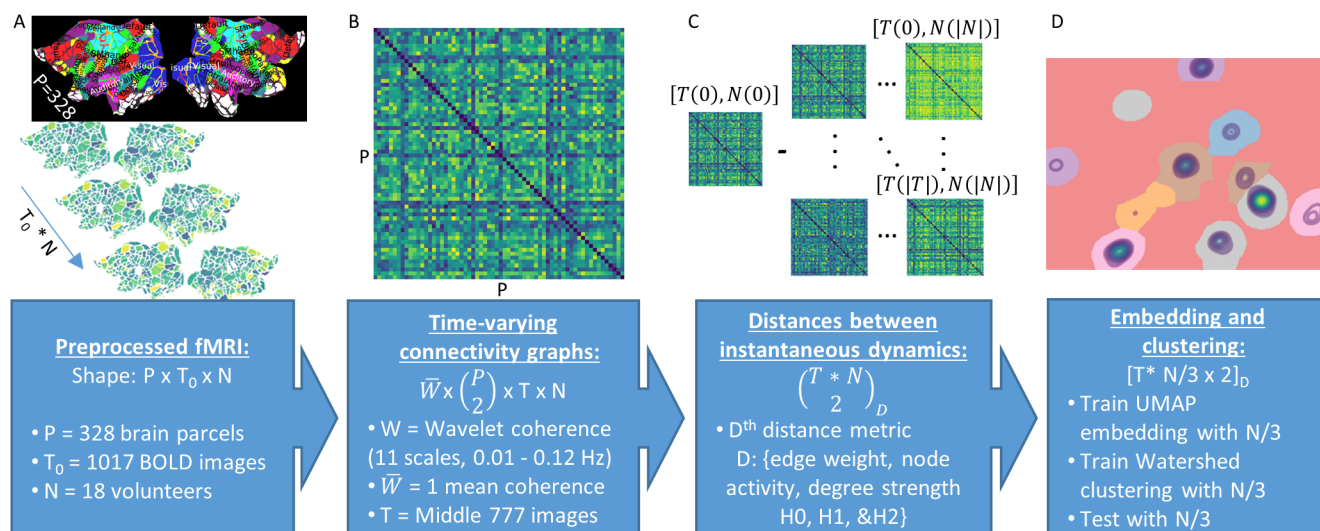

**Figure 1: Analysis pipeline.** We present the analysis pipeline as a flow diagram in four steps. First, the pipeline accepts preprocessed and spatially segmented BOLD fMRI data as inputs. Then, for each scan, we compute time-varying functional connectivity (TVFC) matrices as the weighted mean of the wavelet coherence between all brain regions, across all time points. Because the wavelet kernel operates over a portion of the time-frequency domain, we remove the outside temporal and spectral edges of the coherence matrix where data padding is required. Next, we compare instantaneous brain dynamics using 6 metrics. Three metrics quantify the similarity among simplex decorations, while the other three compare the lifetimes of persistent homological groups at different dimensions. Finally, we embed each brain dynamics metric space onto 2-dimensions for visualization, clustering, and statistical analysis. To improve separability among temporally adjacent time points, and to ensure an unbiased clustering of embedded regions, we split volunteers into three groups: 1) an embedding training group, 2) a clustering training group, and 3) a testing group. Statistical results are computed after 256 bootstrapped reinitializations of the volunteer-wise split into the three groups.

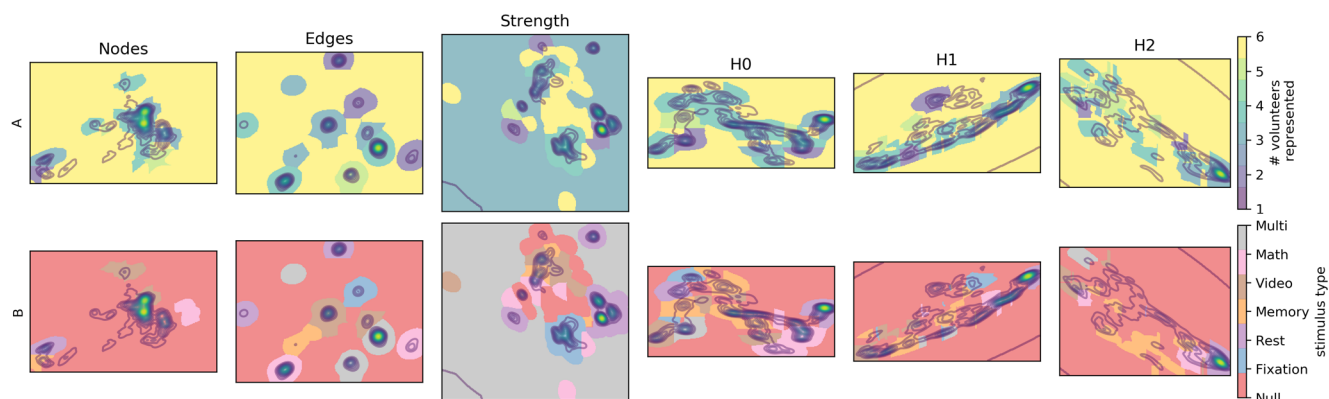

Figure 2: **Brain dynamics embeddings for different underlying metrics.** We display one realization of the embedded clusters for each of the six metric spaces under investigation. Dense regions of the embedding segment the space into clusters. Clusters are color coded if the underlying points bear statistically significant associations with between 1 to 6 volunteers (part A), or with each of the 5 experimental conditions (part B). (The label 'multi' identifies regions independently associated with at least 2 different stimuli).

### 100 *Volunteer-wise representation*

101 As an initial test of the quality of each embedding space, we ask how well the clusters in each embedding  
102 generalize across volunteers. To do so, we count the number of points falling into clusters wherein  
103 between 1 and 6 volunteers contributed a *not-insignificant* number of points to each cluster. Figure 3  
104 displays the results of this count as percentages with respect to the total number of time points in the test  
105 embedding. Following the subsampling and bootstrapping schema described in the methods,  
106 volunteer-wise generalizability was assessed over 256 independently reinitialized embeddings. Bold lines  
107 in figure 3 display the mean, while shaded regions show the 95% confidence interval. A right-skewed  
108 distribution indicates increased generalizability, because it means that the densest watershed regions are  
109 significantly populated with many volunteers. A left-skewed distribution indicates that most watershed  
110 regions are specific to one or few volunteers, i.e., that observed brain dynamics are idiosyncratically  
111 related to specific volunteers.

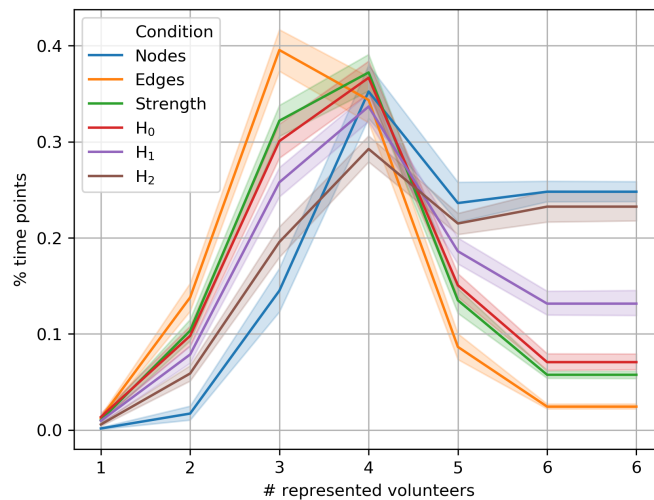

Figure 3: **Volunteer specificity of watershed regions.** We plot the percentage of time points lying within each of 6 bins. Each bin presents the proportion of points belonging to embedding clusters wherein between 1 and 6 volunteers possessed ‘not an insignificant number of points’ in that embedding cluster (inverse left-tail test). Data are presented as mean and 95% confidence interval over 256 independent samples, each sample from a randomly initialized embedding. Bin 6 is expanded for clarity.

112 Overall, topological metric spaces offer embeddings that generalize better across volunteers than the  
113 other metrics we consider. Not only does homology present right-skewed distributions in figure 3, this  
114 category of metrics also aggregates significantly more points into embedding clusters that are general for  
115 all 6 volunteers.

116 It may be possible for metric spaces to generalize too well. For instance, the metric space differing  
117 *node* activity agglomerates the largest percentage of time points into bins having between 4 and 6  
118 represented volunteers. However, as will become clear in the next section, this state generalizability  
119 comes at the cost of the capacity to distinguish between experimental conditions. Indeed, it appears that  
120 the *node* metric space produces embeddings with a single dense core, plus a few distant outliers.

### 121 *Stimulus segmentation*

122 A central indicator of embedding quality is the degree to which time points co-localize when belonging  
123 to the same stimulus condition. Part B of figure 2 shows an example result of testing watershed clusters

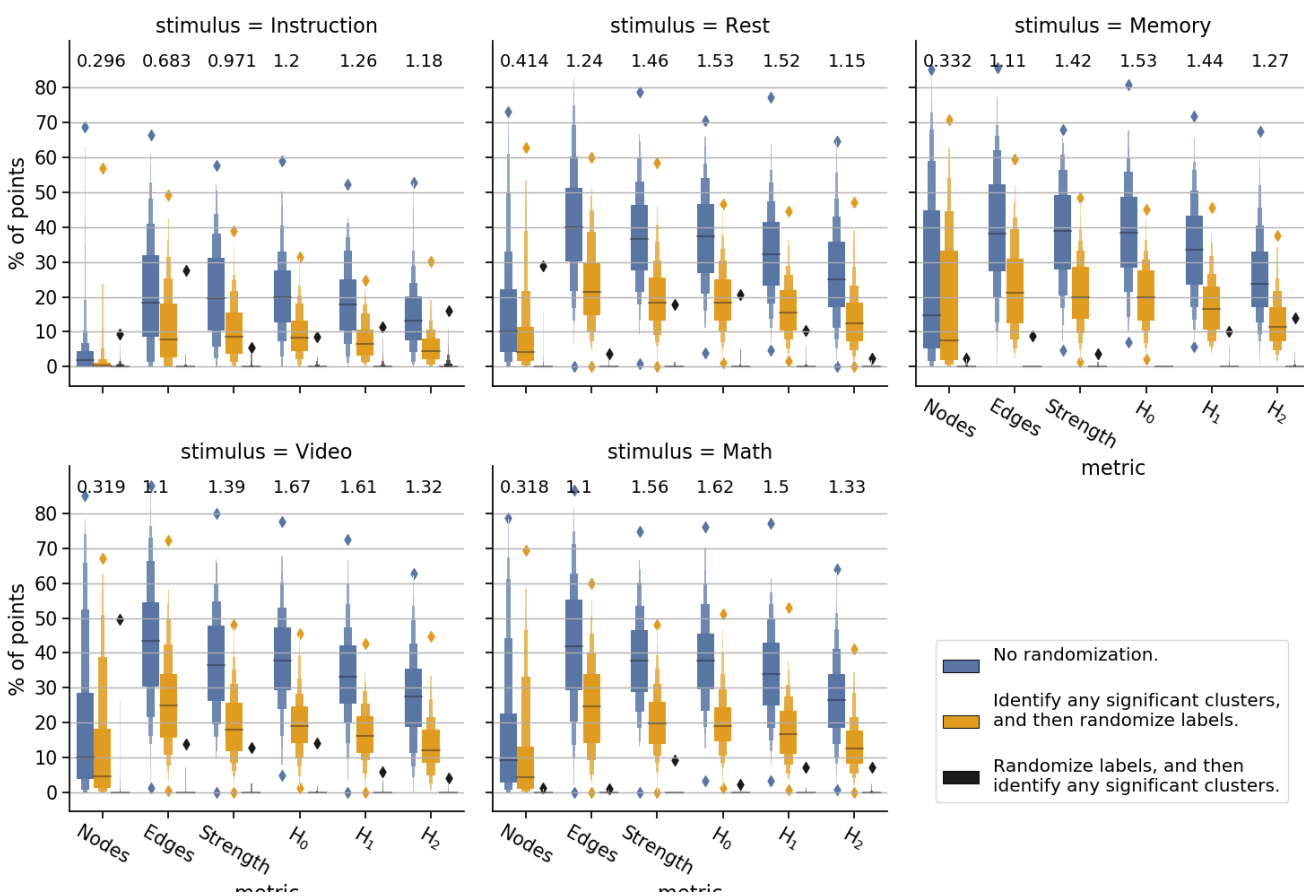

Figure 4: **Comparison of task specificity for watershed regions across different metrics.** We report the percentage of time points assigned to clusters having a significant amount of points from each experimental condition (blue boxplots). For those same clusters, we report the percentage of points from each experimental condition after randomly permuting point labels (yellow boxplots). Additionally, we report the effect size (Cohen's D) between these two distributions (values above boxes). A third distribution (black boxplots) shows the false positive rate for identifying significant clusters.



124 against the hypothesis that a significant number of within-cluster points corresponds to any of the 5  
125 experimental conditions. For each stimulus type, figure 4 shows the percentage of points from that  
126 stimulus residing in clusters significantly associated with that stimulus (blue boxes). Here again, we  
127 report the result as a distribution after 256 independently reinitialized embeddings. Larger percentages of  
128 significantly co-localizing points indicate increased capacity to identify brain-states associated with  
129 experimental stimuli.

130 For comparison, we offer two null models computed from randomly permuted point labels. The first  
131 null distribution (yellow boxes) permutes point labels among the significant clusters defined previously. It  
132 reflects the expected number of points that would randomly collect into the preidentified set of significant  
133 clusters. The inclusion of this null model is motivated by the fact that some embeddings clump more  
134 points than others into the same watershed region, and would thus hold a larger percentage of points from  
135 any experimental condition by default. The effect size (Cohen's  $d$ ) between this null distribution and the  
136 real distribution provides an indication of how well each embedding isolates brain states induced by  
137 distinct experimental stimuli. The second null distribution simply permutes point labels before attempting  
138 to find watershed clusters having a significant number of points from any of the 5 experimental conditions  
139 (black boxes). This second null distribution provides a good check on the rate of false positives.

140 Here again, the homology-based embeddings perform very well compared to embeddings constructed  
141 from simplicial overlap. This is especially the case for the  $H_0$  metric space which tends to present, over  
142 all stimuli, the highest effect sizes. The second highest effect size is found from the  $H_1$  metric space.  
143 And the third from the *strength* metric space.

144 It is interesting to note that, of all the homology-based metrics, the embeddings using Wasserstein  
145 distances in  $H_2$  provide the worst segmentation over stimuli. While this may indicate that aspects of  
146 TVFC topology are restricted to very low dimensions, the computationally-motivated coarsening of  
147 voxelwise information into 328 brain regions also limits the appearance of high-dimensional homologies.

148 The embeddings over *nodes* produce states that are highly generalizable across volunteers, but that are  
149 very poor at distinguishing experimental conditions. In direct contrast, the embeddings over *edges* are the  
150 least generalizable across volunteers, but produce embeddings wherein many time points are found in  
151 watershed clusters with correctly labeled experimental conditions.

152 **Task performance**

Table 1: Primary statistics, over all distances between pairs of instantaneous brain dynamics.

|                 | min    | mean | max  |
|-----------------|--------|------|------|
| <i>Nodes</i>    | 5.7    | 38   | 82   |
| <i>Edges</i>    | 0.0034 | 0.36 | 0.55 |
| <i>Strength</i> | 0.0013 | 0.20 | 0.54 |
| $H_0$           | 0.12   | 8.1  | 31   |
| $H_1$           | 0.14   | 2.8  | 9.0  |
| $H_2$           | 0.043  | 1.7  | 6.3  |

153 Assuming that differences in performance should be detectable as different brain states under common  
154 stimuli, we expect to see large differences between measures of brain dynamics during task time points in  
155 which volunteers made fewer or more correct responses. We can test this because the experimental  
156 design includes performance metrics for each task, especially the percentage of correct responses for  
157 each task block. To do this we computed “mean performance graphs” for each task and each valenced  
158 performance level (see Methods). Within each task, performance was valenced as having either more  
159 correct responses, or fewer correct responses with respect to a mean split of the performance  
160 characteristics for that task from the entire dataset.

161 Part B of figure 5 displays distances between pairs of mean graphs (across metric spaces and  
162 performance levels). Of particular note are the distances computed across the valenced performance  
163 levels, but within the same category of metric space (figure 5, white annotations). These values directly  
164 measure the sensitivity of each metric space to distinguishing different brain states under common  
165 stimuli. Overall, the distance between valenced mean graphs is largest with respect to the topological  
166 metric spaces. This is especially true from the perspective of the Jaccard distance (part C of figure 5,  
167 lower triangles). From the perspective of the Wasserstein distance in  $H_0$  (upper triangles), the *strength*  
168 metric also demonstrates strong cross-valence differences.

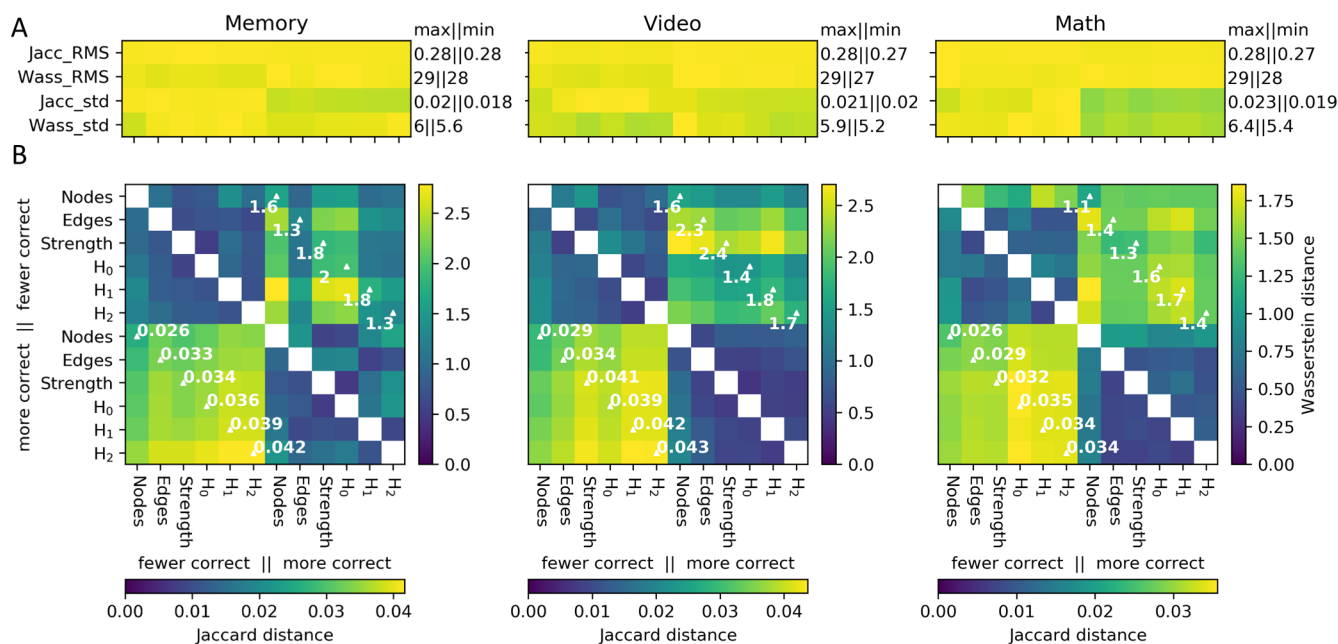

**Figure 5: Distances between mean graphs from different performance levels.** Mean performance graphs are calculated by taking the mean edge weights for all time points (from any volunteer or condition, and across all embedding reinitializations) located in watershed clusters that are both significantly populated by a given task, and also wherein significantly more or fewer correct responses (with respect to a mean split) were also found for that task (see Methods). Part A of the figure shows the RMS and standard deviations for distances computed between each mean graph versus the set of graphs from which each mean graph was drawn. An annotation is given for the maximum and minimum values in each row. Separate colormaps depict the values in each row. The minimum value is set to 0 for all colormaps. Part B shows distances between the mean performance graphs themselves. Annotations are provided for distances computed within each metric space, but between high performance and low performance mean graphs. For the sake of comparison, distances between mean graphs are calculated with both the weighted Jaccard distance between edges (lower triangle of part B), and also with the sliced-Wasserstein distances between  $H_0$  persistence diagrams (upper triangle). The lower colorbar references the lower triangle, and right colorbar references the upper triangle.

169 The values in part B of the figure should be compared against summary statistics in part A, and to table  
170 1. Displaying the RMS and standard deviation of the set of distances between each mean graph and their  
171 component TVFC graphs provides some indication of the diversity of brain dynamics at times with  
172 common stimuli and response characteristics. Compared to table 1, the RMS *edge* distance between  
173 mean graphs and component graphs is below the average *edge* distance across all graphs. By contrast, the  
174 RMS Wasserstein distance in  $H_0$  between mean graphs and component graphs approaches the maximum  
175  $H_0$  distance across all graphs. Through the lens of a simplicial approach, mean graphs localize centrally  
176 among all graphs. By contrast, through the lense of the Wasserstein distance in  $H_0$ , mean graphs are very  
177 different from all other graphs. This observation confirms that the simplicial approach and the  
178 topological approach are observing very different features of the same datasets.

### 179 *Visualization of homological information*

180 Finally, having identified the high utility of brain-dynamics metric spaces developed from homology to  
181 disambiguate group-general brain states, we wanted to gain some insights into what features of TVFC the  
182 homology resolves. Owing to the optimal performance of the  $H_0$  metric space, in figure 6, we present a  
183 visualization of topological features of a mean performance graph, and also of an instantaneous TVFC  
184 graph. Parts A and B of the figure display the  $H_0$  and  $H_1$  homology groups at a single threshold. But the  
185 topology of a point cloud should be considered over multiple scales. Part C of the figure gives a sense of  
186 the multiscale properties of the lense through topology. Each point in the persistence diagram represents  
187 a different collection of homology groups. Interestingly, the observed homology groups in the mean  
188 performance graph are shifted to further birth coherence distances than the distrabution of homology  
189 groups from the sample TVFC graph. Both distributions of birth and death times are above the threshold  
190 for significant wavelet coherence distance, 0.6, as defined relative to an AR1 model of the input data (see  
191 part B of supplemental figure 0.1).

## DISCUSSION

192 Brain function is believed to emerge from extensive coordination among brain regions. However, what  
193 features typify state-specific brain organization remain a subject of intense and ongoing research  
194 (Battaglia & Brovelli, 2020; Lurie et al., 2020). To better understand the correspondence between the  
195 methods we use to describe brain dynamics, and the quality of the eventual descriptions, we compared

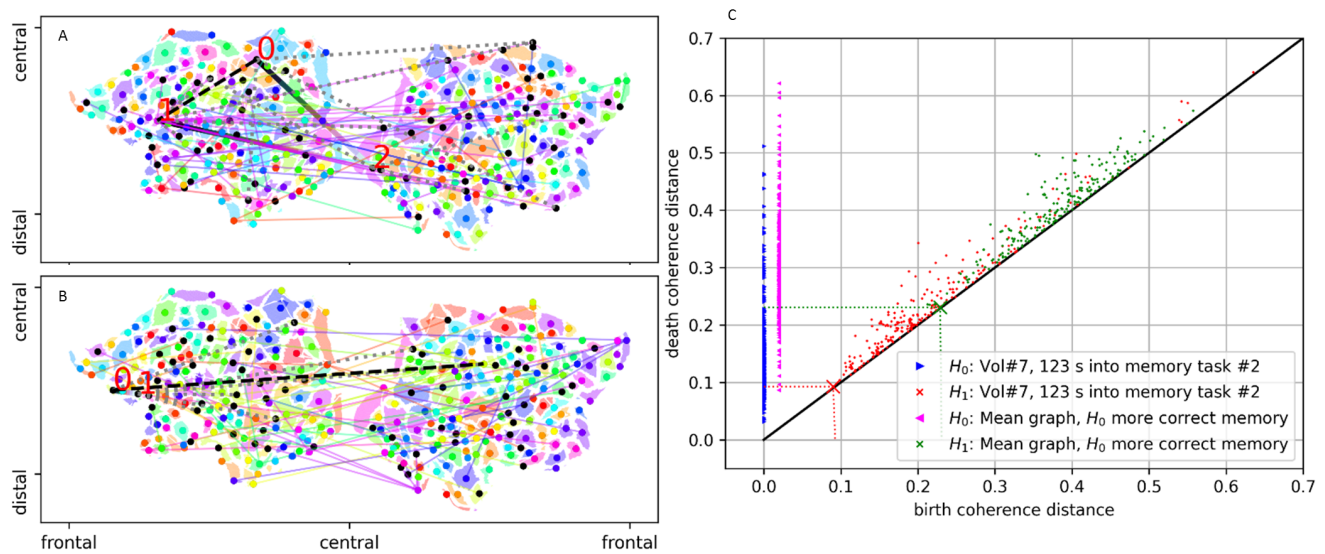

**Figure 6: Illustrative examples of persistent homology in  $H_0$  and  $H_1$**  Whereas persistent homology operates over a multiscale filtration over inter-node distances, parts A and B of the figure illustrate some of what the algorithm is observing by representing the  $H_0$  and  $H_1$  homology groups at a single scale. The image in part A was computed from the mean graph of more correct memory task responses, as observed by the  $H_0$  metric space. The image in part B represents a single time point consistently identified as a member of the mean graph from part A. The threshold corresponds to the first appearance of a cocycle in  $H_1$ . The variegated ('cubehelix' colormap) lines in the brain images display the edges involved the cocycle. The red numbers indicate the nodes connected by cocycle edges. Dotted gray lines indicate all edges below this threshold that connect nodes involved in the indicated cocycle. The black dashed line indicates the edge born on or above the threshold that fills in the cocycle. Brain regions are color coded with respect to their clustering with-respect-to an agglomerative clustering with the 'single' linkage distance. Light colored lines point between brain regions sharing the same cluster. Colored dots represent the brain region having the largest weighted degree strength of the cluster. Black dots represent the other brain regions of the cluster having less than the maximum weighted degree. For reference, part C of the figure displays the persistence diagrams associated to the graphs from parts A and B. The threshold for the brain images in parts A and B are shown as large 'x' markers in part C. The birth time of all  $H_0$  connected components is at zero coherence distance, however, the data are shifted in the 'x' axis for clarity.

196 the performance of two broad classes of TVFC metric spaces: one based upon overlap distances between  
197 decorated  $k$ -simplices, and the other based upon  $k$ -dimensional homological structures. The results of the  
198 present study provide evidence that the homology of coherence-based TVFC effectively disambiguates  
199 experimentally defined brain states in the population-general brain. By contrast, the performance of  
200 approaches based on network and simplicial overlap generally performed worse at distinguishing  
201 population-general and experimentally relevant brain states (see figures 3 and 4).

202 *Intrinsic geometries:* Given a good space for representing brain dynamics, it is possible to observe  
203 stereotypical brain states between more subtly different conditions. Utilizing the same dataset as the  
204 present study, Saggar et al. (2018) computed a distance between node activities to visualize  
205 two-dimensional mappings of within-volunteer temporal similarity. In the majority of cases, the  
206 visualization depicts even transitions across time points. Smooth transitions over short distances are  
207 clearly depicted during the resting state. Smooth transitions are also a feature of most temporally  
208 adjacent transitions during task states. However, for some volunteers, the mapping depicts modularized  
209 transitions within the context of a single experiment.

210 Using a complimentary dataset, Billings et al. (2017) also computed maps of node activity distances.  
211 Distances were mapped across a population of volunteers. Even at the group level, a general trend was  
212 observed of variable activity punctuated by moments of clear transitions between focal brain states.  
213 Similarly, a sample of the *nodes* embedding shown in figure 2 contains  $O(10)$  very dense nodes distributed  
214 along the circumference of a more sparsely populated embedding.

215 *Towards a topological view:* While studies implementing simplicial metrics evidence that brains select  
216 conserved dynamical patterns towards the production of brain function, the empirical and theoretical  
217 support for emphasizing homological and other topological descriptors has prompted several authors to  
218 reinterpret neuronal dynamics from a topological perspective (Curto, 2017; Giusti, Ghrist, & Bassett,  
219 2016; Lerda, 2016; Rasetti, 2017; Reimann et al., 2017; A. E. Sizemore, Phillips-Cremins, Ghrist, &  
220 Bassett, 2019; Stolz, 2014). A. E. Sizemore et al. (2018) evidence that **cliques** and homological cavities  
221 in the mesoscopic space of structural brain images reflect known brain networks. Further evidence that  
222 cliques and homologies encode microscopic interactions among neuronal circuits have been discovered

223 within the hippocampal place field (Basso, Arai, & Dabaghian, 2016; Dabaghian, Brandt, & Frank, 2014;  
224 Giusti, Pastalkova, Curto, & Itskov, 2015) and in the somatomotor representation of the head (Chaudhuri,  
225 Gerçek, Pandey, Peyrache, & Fiete, 2019). The present results provide further support for the utility of  
226 the topological approach to discern the evolution of brain states through time, thus to possibly improve  
227 our comprehension of the brain's multiscale self-organization.

228 As a quantitative tool, persistent homology is tailor-made for defining topological similarities among  
229 metric spaces (Carlsson, 2009). Indeed, fMRI studies have implemented persistent homology to discern  
230 group-level FC differences in task performance (Ibáñez-Marcelo, Campioni, Phinyomark, Petri, &  
231 Santarcangelo, 2019), and with respect to pharmacological treatments (Petri et al., 2014a). Similar  
232 findings are observed in MEG data (Duman et al., 2019). Stateful segmentation was also achieved from  
233 homological features in  $H_0$  for 8-channel EEG TVFC as volunteers engaged in a visuo-motor task (Yoo,  
234 Kim, Ahn, & Ye, 2016).

235 *Visualizing topology:* Certainly, functional connectivity describes a multiscale process. And while there  
236 are ongoing questions regarding the pathways through which otherwise structurally distributed brain  
237 networks form TVFC networks (Damoiseaux & Greicius, 2009); the development of data-driven  
238 functions that operate over spectral and spatial features of complex networks may drive new insights. The  
239 view from homology may be especially useful when topological features are expected to be important,  
240 that is, when one expects multiple scales of patterned connectivity among clusters in  $H_0$ , and/or higher  
241 order (dis)-connected cycles in  $H_1$  and above. In pursuit of this hypothesis, it may be useful to start with  
242 a more dense spatial sampling over brain regions. Also, the expansion of the spectral data into a  
243 multi-layer graph may improve stateful representations. In any case, the present observation of  
244 meaningful homology in  $H_0$  may relate to the fundamental description of brains as functioning through  
245 multiple scales of interacting brain regions. Given the theoretical significance of homology in  $H_0$  (e.g.,  
246 multiscale clustering), and its computational speed increases relative to computing homology in  $H_1$  and  
247 above; it appears to be worthwhile to use persistent homology in  $H_0$  as a general tool for describing and  
248 comparing brain states.

249 *Limitations and future directions:* Future research should strive to make a more detailed catalogue of the  
250 homologies that commonly appear among brain regions. While the present study resorted to a very coarse  
251 brain parcellation to visualize homology (see figure 6), it is not clear how stable these minimal cycles are.  
252 Indeed, it is not clear that 333 parcels provides a maximal resolution of brain dynamics. In theory, more  
253 parcels should enhance the capacity for persistent homology to distinguish brain states; albeit, up to some  
254 plateau. By contrast, elementwise operations over simplicial decorations benefit from clustering (Glasser  
255 et al., 2016; Gordon et al., 2016) and unmixing (Kunert-Graf et al., 2019; Smith et al., 2009). Future  
256 should utilize this stability property of TDA to catalogue the stability of cycles across multiple scales of  
257 parcellation. Another limitation of the present study is the reliance on clustering in the low-dimensional  
258 space. Even while low-dimensional embeddings provide an efficient means for visualizing data, there is  
259 always some loss of information. For instance, the UMAP method for embedding point cloud data  
260 transduces an explicit nearest-neighbor approximation of the high-dimensional simplicial complex into  
261 the low-dimensional space. This approximation may be causally related to the observation that metric  
262 spaces based upon, especially, 1-dimensional simplicial overlap organize into temporally-adjacent  
263 clusters. While edge overlap may be a volunteer-specific trait. And while the trait may be partially  
264 alleviated by deconvolution of the volunteer-specific hemodynamic response function, future work that  
265 biases the low-dimensional embedding in a more appropriate way—perhaps by learning a transductive  
266 vector embedding as in Bai et al. (2019)—may offer some additional improvements. In any case,  
267 approaches that circumvent dimensionality reduction entirely by operating in the native high-dimensional  
268 space may offer the most general solution to the loss of information during low-dimensional embedding.

269 Finally, it is always interesting to consider more concise multispectral decompositions than provided  
270 by Morlet wavelet kernels. Perhaps kernels that imitate the canonical hemodynamic response function  
271 would offer a more compact representation of fMRI data. Also, while the Morlet wavelet is roughly  
272 symmetric, it may be useful to implement asymmetric filters that place more emphasis on information  
273 from more recent time points.

274 *In conclusion:* To understand the dynamic self-organization of complex systems like the brain, it helps  
275 to view system dynamics through lenses that highlight the presence and the structure of complexes.  
276 Given the kinds of weighted graphs typical of TVFC analysis, persistent homology is well-suited for



277 interpreting complexes of brain regions. The view from homology outperforms more traditional graph  
278 metrics —like the activity measures of 0-dimensional nodes, and like the weights of 1-dimensional  
279 edges—at the task of segmenting experimentally defined brain states into patterns that generalize well  
280 across multiple volunteers. The utility of these data-driven multiscalar methods inspires additional  
281 research into the topology of high-dimensional connected objects.

## METHODS

282 As described in figure 1, our procedure unfolds across 4 steps:

- 283 1. Acquire task and resting-state BOLD fMRI data from a group. Apply minimal preprocessing.
- 284 2. Compute TVFC as instantaneous coherence.
- 285 3. Differentiate instantaneous brain dynamics via each of 6 metrics:
  - 286 (a) Euclidean distance between *node* topographies
  - 287 (b) Weighted Jaccard distance between *edge* geometries
  - 288 (c) Weighted Jaccard distance between the weighted degree *strength* of networks
  - 289 (d) Sliced-Wasserstein distance between topographic persistence diagrams in  $H_0$
  - 290 (e) Sliced-Wasserstein distance between topographic persistence diagrams in  $H_1$
  - 291 (f) Sliced-Wasserstein distance between topographic persistence diagrams in  $H_2$
- 292 4. Embed distance onto 2-dimensions for visualization and statistical analysis

### 293 *Data acquisition and preprocessing*

294 To discern the relative capacities of a range of distance metrics to disambiguate the dynamical  
295 brain-states induced by stimuli, for the present study, we adopted a dataset acquired during the  
296 presentation of multiple experimentally defined tasks. The present study benefited from scans acquired  
297 continuously over relatively long time spans as the process of spectral filtration requires complete overlap  
298 between the signal and the filtration kernel to avoid affects at the undefined edges of the time series. And,  
299 whereas we are interested in signals in the low-frequency fluctuation range (1/100 seconds<sup>2</sup>), we required  
300 scans to be at least longer than 200 seconds.

301 The data acquired by Gonzalez-Castillo et al. (2015) meet these criteria. These data have been  
302 publicized as an open-access dataset through the XNAT neuroimaging database (<https://central.xnat.org>;  
303 Project ID: FCStateClassif). Here, we briefly summarize the dataset as follows: 18 volunteers were  
304 scanned continuously over 25.5 minutes (7 Tesla, 32-element coil, gre-EPI, TR=1.5s, TE=25ms, 2mm  
305 isotropic). Preprocessing was performed to transform individual datasets into a common MNI space and  
306 to remove artifacts from slice timing, motion, linear trends, quadratic trends, white matter signals, and csf  
307 signals. Data were spatially smoothed using a 4mm FWHM Gaussian filter. They were temporally  
308 band-pass filtered to between 0.009 Hz and 0.08 Hz. Finally, images were downsampled to 3mm  
309 isotropic, and normalized to common (MNI) coordinates. Data were acquired in compliance with a  
310 protocol approved by the Institutional Review Board of the National Institute of Mental Health in  
311 Bethesda, MD. For complete preprocessing details, please refer to Saggar et al. (2018). In addition to the  
312 aforementioned steps, voxelwise data were spatially aggregated onto an atlas of 333 brain regions  
313 (Gordon et al., 2016). Up to 5 brain regions contained no information from some volunteers, and were  
314 excluded from all datasets for the remainder of the analysis. (Numbers 133, 296, 299, 302, and 304,  
315 indexed from 0. See also the missing patches in figure 1, part A) Thus, the finest granularity of study  
316 results are over  $333-5=328$  brain regions. During the scan, volunteers interacted with 3 block-design  
317 tasks and one rest stimulus. Each task was presented twice. Each task presentation lasted 3 min, and was  
318 preceded by a 12s instruction block. Tasks included: ‘video,’ watching videos of a fish tank while  
319 responding to a visual target; ‘math,’ computing algebra problems; and ‘memory,’ a 2-back memory task  
320 with abstract shapes. A ‘rest’ stimulus was also included, and entailed the presentation of a fixation cross  
321 for 3 minutes. Stimuli were randomly ordered in a fixed sequence for all volunteers. For each task block,  
322 performance metrics were collected, including the percentage of correct responses.

### 323 *Time-varying connectivity*

Considering that individual frequency bands develop significantly different FC parcellations (Billings et al., 2018) and different connectivity hubs (Thompson & Fransson, 2015). And, considering that neuroelectric activity is intrinsically rate coded. The delayed and (hemodynamic response function) band-pass filtered version of neuroelectric activity that is the BOLD signal is likely to retain some rate-coded information. Given these observations, the present study recasts the BOLD signal from each brain parcel in terms of time-frequency spectrograms generated through the use of the Continuous

## Wavelet Transform (CWT)

$$W_t(s) = \sum_{t=0}^{T-1} f(t) \frac{1}{s} \psi^* \left( \frac{t-u}{s} \right) \delta t,$$

324 where  $\cdot^*$  indicates the complex conjugate. By adjusting the time localization parameter  $u$  and the scale  
325 parameter  $s$  for the wavelet kernel  $\psi$ , the CWT affects a multiscale decomposition of input signal  $f(t)$  for  
326 all times  $t \in T$ . For the present study, the filterbank comprised 15 scales log-distributed between 0.007  
327 and 0.15 Hz.

328 Following Torrence, Compo, Torrence, and Compo (1998), symmetric wavelets will produce similar  
329 coherence values. And without strong support for any particular wavelet kernel, we adopt the complex  
330 Morlet wavelet as the CWT kernel. The filter is a plane wave modified by a Gaussian,  
331  $\psi = e^{i\omega_0 t/s} e^{-t^2/(2s^2)}$ . And we set the base frequency to  $\omega_0 = 6$ . Following Farge and Marie (1992), an  
332  $\omega_0 > 6$  ensures the function's non-zero average is outside machine precision (Farge & Marie, 1992).  
333 Spectral selectivity increases with increasing  $\omega$ , at the expense of decreased temporal selectivity (e.g.,  
334 sharper filters require more temporal support). Thus, a base frequency of  $\omega_0 = 6$  ensures maximal  
335 temporal resolution.

A complex valued kernel computes instantaneous amplitude and phase information. From there, it is possible to compute wavelet coherence as follows. For a pair of complex-valued spectrograms,  $W^X$  and  $W^Y$ , the quantity  $W_t^{XY}(s) = W_t^X(s)W_t^{Y*}(s)$  is the cross-wavelet spectrum. Its absolute value,  $|W_t^{XY}(s)|$ , is the cross wavelet power which represents the shared power between signals at scale  $s$  and time  $t$ . Coordinated changes in amplitude may be computed in terms of the wavelet squared coherence,

$$R_t^2(s) = \frac{|\langle s^{-1}W_t^{XY}(s) \rangle|^2}{\langle s^{-1}|W_t^X(s)|^2 \rangle \langle s^{-1}|W_t^Y(s)|^2 \rangle}.$$

The functional  $\langle \cdot \rangle$  indicates smoothing in both time and scale. The factor  $s^{-1}$  is used to convert to scale-dependent energy densities. The wavelet squared coherence is an instantaneous and multispectral analogue of the Pearson correlation (Marwan, Thiel, & Nowaczyk, 2002; Torrence et al., 1998; Torrence, Webster, Torrence, & Webster, 1999). Its values range between 0 (completely incoherent) and 1 (completely coherent). While it is theoretical possible to treat TVFC as a multilayer graph having as many layers as spectral scales, practical computational concerns prompt us to concatenate multispectral coherence into a single broadband average. To do so, we take the weighted mean of the wavelet squared

coherence with respect to the normalized cross wavelet power:

$$TVFC_t^{XY} = 1 - \sum^s \frac{|W_t^{XY}(s)|}{\max_s |W_t^{XY}(s)|} R_t^2(s). \quad (1)$$

336 Normalizing the cross wavelet power ensures that the mean coherence remains bounded between 0 and 1.  
337 The peak of the mean cross wavelet power occurs in the frequency range between 0.01 and 0.02 Hz and  
338 (see part A of supplemental figure 0.1). TVFC graph edges are 1 minus the power-weighted coherence to  
339 represent coherence distances between brain regions.

340 To account for the cone of influence at the temporal edges of the wavelet filtration, as well as the loss  
341 of precision at the temporal and spectral edges of the smoothed coherence data, the outside 120 time  
342 points and the outside 2 scales are dropped before taking the summation in equation 1. The removed time  
343 points include one whole “rest” block, and one whole “video” block. Coherence graphs are thus available  
344 for the middle 777 images of the scan, and for 11 spectral scales between 0.0095 and 0.1 Hz.

#### 345 *Distance metrics comparing brain dynamics*

346 *Theory:* Having constructed TVFC graphs for all included time points and for all volunteers, we  
347 pursue two broad alternatives for comparing brain dynamics. The first is related to elementwise  
348 differences between the decorations (e.g. weights) applied to graphs. And the second relates to common  
349 topological features. To describe in detail these two views, it is useful to supply some definitions.

350 A graph  $G = (V, E)$  represents a set of  $V$  nodes interconnected by  $E$  edges. Nodes and edges may be  
351 decorated with properties such as value, weight, directionality, sign, layer, degree centrality, degree  
352 strength etc. A collection of  $k$  completely interconnected nodes forms a clique,  $C$ . In the following, we  
353 identify cliques with geometric primitives called ‘simplices’ in standard fashion (Petri et al., 2014b; Petri,  
354 Scolamiero, Donato, & Vaccarino, 2013); that is, to a clique of  $k + 1$  nodes we associate the  
355 corresponding  $k$ -simplex,  $\sigma_k$ . For instance, 2 connected nodes form a 2-clique. The surface enclosing a  
356 2-clique is a 1-simplex, i.e., an ‘edge’. A 2-simplex formed by a clique of 3 connected nodes is a ‘filled  
357 triangle’, and so forth for higher-order simplices.

358 Formally, a simplicial complex is a topological space,  $\mathcal{K}$ , composed of all  $\sigma_k$  and their subfaces. Along  
359 the same lines, a clique complex,  $Cl(G)$ , is a simplicial complex formed from an unweighted graph  $G$  by

360 promoting every  $k$ -clique into a  $(k - 1)$ -simplex. Holes in dimension  $k$  may develop within the  
361 boundaries established by closed chains of  $(k - 1)$ -simplices. Such holes are called ‘homologies.’

362 The ‘topological approach,’ TDA, includes methods for identifying topological features of an abstract  
363 geometric object represented by a data sampling. By contrast, the more traditional approach to  
364 comparing brain dynamics constitutes a ‘simplicial approach’ that directly compares the decorations  
365 applied to sets of simplices.

366 *Homology:* The boundary of a homology is termed a, ‘homological cycle’ or ‘generator.’ To illustrate  
367 the concept, consider the case of four nodes connected in a cycle such that each node has exactly two  
368 edges. The nodes form neither a 4-clique nor a 3-dimensional simplex because there are two missing  
369 edges. Rather, these nodes form a connected cycle that is the boundary of a 2-dimensional hole. This  
370 void space is also called a *homology* in dimension 1 (i.e., formed by a set of 1-d edges). The  $k^{th}$   
371 homology group,  $H_k(\mathcal{K})$ , describes the  $(k + 1)$ -dimensional holes bounded by chains of  $k$ -simplices. For  
372 example, the  $H_1$  homology group are the holes bounded by edges in  $\mathcal{K}$ ;  $H_2$  are the voids bounded by  
373 filled triangles; etc.

374 The term ‘homology’ follows from the Greek ‘homo,’ the same, and ‘logos,’ relation, to indicate that  
375 the hole belongs to an equivalence class that is categorically the same across continuous deformations  
376 that neither break the boundary nor create new simplices spanning the boundary: e.g., inflation,  
377 compression, rotation, and translation. Different representative cycles may therefore exist that describe  
378 the same homological cycle. For instance, a very elastic coffee cup could be continuously contracted into  
379 the shape of a donut, as they share the same toroidal topology. For the sake of convenience, a  
380 homological cycle is often represented as the minimal representative cycle (Guerra, De Gregorio,  
381 Fugacci, Petri, & Vaccarino, 2020; Petri et al., 2014b).

*Simplicial distances:* The first approach, which we will denote as ‘simplicial,’ computes an average of  
the elementwise differences between the decorations applied to each  $k$ -simplex in the complex. For  
example, in the present study, we compute the weighted Jaccard overlap distance between the weights of

TVFC edges as

$$D_J(G1, G2) = 1 - \frac{\sum_{e \in E} \min(e_{G1}^w, e_{G2}^w)}{\sum_{e \in E} \max(e_{G1}^w, e_{G2}^w)},$$

382 where  $e_G^w$  is the weight of the  $e^{th}$  edge in graph  $G$ .

383 Further we compute distances between the explicit 0-dimensional values decorating each node; e.g.  
384 with respect to the signal activity of each *node*. Specifically, for each point in time, we treat the absolute  
385 values of multispectral wavelet coefficients from all brain regions as an ordered vector. We then compute  
386 the Euclidean distance between vectors from different points in time.

387 The third distance is inspired by previous work on relations between graph networks and homological  
388 cycles. Lord et al. (2016) demonstrate that the nodes' weighted degree (also called *strength*) is  
389 significantly correlated with the frequency and the intensity with which nodes participate in the shortest  
390 representatives of homological cycles. The third distance is thus the weighted Jaccard distance between  
391 vectors of the node-wise weighted degree, also called the *strength*, of each TVFC graph.

392 *Homological distances:* While many TVFC studies regard only the graph's connectivity as the feature of  
393 primary import, TDA provides a suite of tools to further develop network properties into conserved  
394 higher-order structures in point-cloud data (Carlsson, 2009; Edelsbrunner, Letscher, & Zomorodian,  
395 2002; Patania, Vaccarino, & Petri, 2017) and in weighted networks (Chung, Lee, Di Christofano, Ombao,  
396 & Solo, 2019; Petri et al., 2013; A. Sizemore, Giusti, & Bassett, 2017).

397 Homology is defined on simplicial complexes. In the case of persistent homology of weighted graphs,  
398 simplices are added to the complex incrementally, and appear at and beyond some threshold. Varying this  
399 threshold allows to track how homological features appear and persist across thresholds (Petri et al.,  
400 2013). A complete representation of homological features within some range of thresholds is called a  
401 'filtration.' By observing topological features over a filtration, "persistent homology" allows to take a  
402 multiscale view of the data which accounts for both the explicit connectivity structure of the system, as  
403 well as the relative importance of ensembles of connections that emerge over some range of scales.

404 Formally, we define the Vietoris-Rips simplicial complex  $\mathcal{K}_r = Rips(G(E < r))$  as the  
405 clique-complex of the weighted graph  $G$  composed after removing all edges,  $E$ , longer than  $r$ . From this,  
406 we may recover the complex's  $k$ -dimensional homology group,  $H_k(\mathcal{K}_r)$ . Within the boundaries of

407 thresholds  $a$  and  $b$ , let  $[r_a, \dots, r - \epsilon, r, \dots, r_b]$  be the longest series wherein any  $H_k(\mathcal{K}_r)$  and  $H_k(\mathcal{K}_r - \epsilon)$   
408 are not identical. The ordered set  $[H_k(\mathcal{K})]$  defines a ‘filtration’ over  $G$ . A homology class  $\alpha \in H_k$  is said  
409 to be *born* at radius  $u$  if a class of homotopy equivalent homologies is not supported in  $\mathcal{K}_r$  for any  $r < u$ .  
410 The homology class  $\alpha$  is said to *die* going into  $\mathcal{K}_v$  if  $v$  is the lowest index wherein at least one  
411  $(k + 1) - clique$  is established within the boundary of the homology. Persistent homology was computed  
412 using version 0.4.1 of the Ripser package as bundled with the Scikit-TDA toolbox for python (Tralie,  
413 Saul, & Bar-On, 2018). Ripser finds it is faster to compute cohomology, the covariant **functor** of  
414 homology. Thus the algorithm computes cocycles in  $H_k$  that track the disappearance of  $\sigma_{k+1}$  along the  
415 reversed filtration De Silva, Morozov, and Vejdemo-Johansson (2011).

416 The persistent homology of a filtration over  $G$  is summarized by collecting the birth/death pairs of  
417  $k$ -dimensional homology classes as points  $(u, v)$  in a ‘persistence diagram’. It is naturally possible to  
418 compute a persistence diagram for each simplicial dimension up to the maximum dimension of the  
419 simplicial complex. But because the computational load to calculate persistence homology increases  
420 exponentially with the homology dimension, we limit the present study to the investigation of persistence  
421 homology in dimensions 0, 1, and 2. The case of 0-dimensional persistence diagrams—corresponding to  
422 0-dimensional holes, that is, disjoint sets of connected nodes—is particularly interesting as the  
423 homological classes are slices through an agglomerative clustering among nodes when using the ‘simple’  
424 linkage distance.

425 Persistence diagrams can, themselves, be endowed with a metric structure. This means that it is  
426 possible to measure distances between persistence diagrams. Such distances encode how different the  
427 homological structures of two TVFC graphs are. One such distance is a multi-dimensional analogue of  
428 the earth-mover distance, known as the sliced-Wasserstein distance (Carrì, Cuturi, & Oudot, n.d.). The  
429 sliced-Wasserstein distance between persistence diagrams is bounded from above by the total distance  
430 between the associated topological spaces (Mileyko, Mukherjee, & Harer, 2011). In the present study, for  
431 each pair of persistence diagrams of a given dimension, we calculate the average Wasserstein distance,  
432 over 20 slices (see Carrì et al. (n.d.) for details). That is, for all pairs  $G^i = G^j$  we compute,  
433  $d(H_k(\mathcal{K}^i), H_k(\mathcal{K}^j))$ .

434 **Visualization/Output**

435 Having developed metric spaces to compare simplicial and homological brain dynamics, we want to  
436 assess their relative capacities to represent apparent brain states. To this end, we embed each metric space  
437 onto a 2-dimensional manifold using the Uniform Manifold Approximation and Projection (UMAP)  
438 algorithm (McInnes, Healy, & Melville, 2020). As illustrated in figure 2, the embedding process  
439 facilitates state-space visualization and segmentation. UMAP approximates a metric space's  
440  $n$ -dimensional manifold in three steps. First, the algorithm calculates the  $k$ -nearest neighbors of each  
441 point. Second, each neighborhood is promoted to a local simplicial complex. Third, the algorithm  
442 searches for the  $n$ -dimensional distribution of points that best approximates the original simplicial  
443 complex. This search is conducted over successive iterations, with the initial position of low-dimensional  
444 points derived from a random distribution.

445 To better understand the distribution of points in the resulting embedding spaces, we transformed point  
446 clouds into a Gaussian distribution and estimated clusters via a watershed transform. An illustration of  
447 watershed clustering is found in part B of figure 2. The Gaussian grid size was initially set to 256x256.  
448 The number of grid points in the dimension having the smaller range was trimmed to maintain the aspect  
449 ratio of the embedding. The Gaussian kernel bandwidth factor was set to 0.08. The watershed transform  
450 marks the local densities as cluster centers, then grows clusters by adding adjacent pixels whose directed  
451 gradient is maximal in the direction of the cluster center.

### 452 *Subsampling and Bootstrapping*

453 In the present study, we were concerned with resolving 2-dimensional embeddings that generalize across  
454 volunteers, while also segmenting experimental stimuli. One challenge in the way of resolving this ideal  
455 embedding is that brain states tend to change slowly through time. An example of this issue is shown in  
456 supplemental figure 0.2 for the metric between TVFC *edges*. Temporal similarities draw the distance  
457 between adjacent time points closer than the distance between two different volunteers experiencing the  
458 same stimuli. For dimensionality-reduction algorithms like UMAP and tSNE that leverage  
459 nearest-neighbor approximations, the attractive force between temporally-adjacent time points can force  
460 the embedding to over-emphasize information about the order of the scanning sessions when attempting  
461 to resolve population-wise brain states.



462 To help disentangle graphs representing intrinsically similar brain states from those that are simply  
463 autocorrelated, we subsampled our dataset in several ways. Statistics over the results could then be  
464 generated via bootstrapping, with 256 random permutations of data subsamplings.

465 Volunteer-wise scans were split into three equal groups. The first group supplied data to train the  
466 UMAP embedding. The second group supplied data to segment the space of the embedding into  
467 watershed clusters. The third group supplied data to test how metric spaces segment brain states during  
468 contrasting experimental conditions.

469 The data were also split in time. To balance the number of time points from each experimental  
470 condition, one of each of the repeated mathematics and memory tasks were removed, at random, from  
471 each volunteer's dataset. Also, embeddings were trained using 100 time points from the remaining 537  
472 time points of 6 volunteers. These 100 training points were selected to emphasise maximal temporal  
473 separation.

#### 474 *Statistical Analysis*

475 Watershed clusters provide a data-driven basis for hypothesis testing over the likelihood that certain  
476 metadata labels—that is, volunteer number, stimulus type, and performance—were more or less likely to  
477 be found in a given embedding region. For all statistical tests, we generated null distributions by  
478 randomly permuting the labels of cluster points (e.g. volunteer number, experimental condition, etc.) 300  
479 times. This procedure obtained a mean and standard deviation that indicates the labels we should expect  
480 to find by chance in any given cluster. The significance threshold was always set to an  $\alpha = 0.05$ .  
481 Bonferroni correction was applied relative to the number of simultaneous tests performed. And the total  
482 number of clusters was  $O(100)$  in each embedding.

483 Tests related to volunteer co-localization calculated significant volunteer-wise under-representation in  
484 each cluster (left-tail test, Bonferroni correction equal to the number of volunteers (6) times the number  
485 of clusters per embedding ( $O(100)$ ). Tests related to stimulus co-localization identified clusters that were  
486 more than likely to contain time periods during each stimulus condition (right-tail test, Bonferroni  
487 correction equal to the number of stimulus conditions (5) times the number of clusters in each embedding  
488 ( $O(100)$ ). Tests related to task performance were conducted for each task condition independently, and  
489 were confined only to the clusters that were significantly more likely to contain points from the task

490 being tested (two-tailed test, null-distribution is the mean and standard deviation of task performance,  
491 Bonferroni correction equal to the number of clusters showing significantly many within-condition time  
492 points ( $O(10)$ )).

### 493 *Secondary Statistics over Mean Graphs*

494 It is possible to generate mean FC matrices from select time points of TVFC graphs. For instance, the  
495 mean TVFC graph over all time points reveals the average coherence between regions.  
496 Condition-dependent mean graphs such as that over all rest conditions may also be calculated. In the  
497 present study, we were particularly interested in mean graphs calculated with respect to within-task  
498 performance levels.

499 Given the identification of clusters significantly associated with task performance. For each task, and  
500 for each cluster associated to the task, we tested whether the task-specific points within that cluster  
501 contained significantly more or fewer correct responses than the mean percentage of correct response for  
502 all of that task's time points (no Bonferroni correction). For each task, every time point from clusters  
503 having significantly more correct responses is stored into a task-specific list. The same process occurs for  
504 clusters showing fewer correct responses. The mean TVFC graph from each list constitutes a 'mean  
505 performance graph.' Mean performance graphs may be compared to one another to measure a difference  
506 between apparent brain states.

## ACKNOWLEDGMENTS

507 This work could not have proceeded without the insights from Dr. Alessio Medda on wavelet theory, nor  
508 without the essential works of our global communities.

## COMPETING INTERESTS

509 The authors declare no competing interests.

## TECHNICAL TERMS

510 **topography** The vector if a multivariate signal measuring a system at a given instant.

- 511 **geometry** The study of distance functions.
- 512 **graph** A finite set of nodes, equipped with a finite set of edges.
- 513 **network** A graph where-in edges convey the property "interacts with."
- 514 **topology** A collection of subsets of a set.
- 515 **topological space** A totality of two elements: a set of points, and a topology on this set.
- 516 **clique** A set of  $k$  nodes.
- 517 **simplex** The  $k$ -dimensional convex hull of a clique of  $k + 1$  nodes.
- 518 **simplicial complex** A collection of multiple simplices.
- 519 **homology** A  $k$ -dimensional hole bounded by cyclically connected  $(k + 1)$ -dimensional simplices.
- 520 **filtration** Varying the threshold parameter of a weighted graph to resolve simplicial complexes with  
521 altered homology.
- 522 **functor** A function between categories which maps objects to objects and morphisms to morphisms.  
523 Functors exist in both covariant and contravariant types.

524

## 525 REFERENCES

526

- 527 Bai, Y., Ding, H., Qiao, Y., Marinovic, A., Gu, K., Chen, T., ... Wang, W. (2019). *Unsupervised Inductive Graph-Level*  
528 *Representation Learning via Graph-Graph Proximity*.
- 529 Basso, E., Arai, M., & Dabaghian, Y. (2016). Gamma Synchronization Influences Map Formation Time in a Topological  
530 Model of Spatial Learning. *PLOS Computational Biology*, 12(9), e1005114. Retrieved from  
531 <https://dx.plos.org/10.1371/journal.pcbi.1005114> doi: 10.1371/journal.pcbi.1005114
- 532 Battaglia, D., & Brovelli, A. (2020). *Functional connectivity and neuronal dynamics: insights from computational methods*  
533 (Tech. Rep.). Retrieved from <https://hal.archives-ouvertes.fr/hal-02304918>

- 534 Battiston, F., Cencetti, G., Iacopini, I., Latora, V., Lucas, M., Patania, A., . . . Petri, G. (2020). Networks beyond pairwise  
535 interactions: structure and dynamics. *Physics Reports*.
- 536 Billings, J., Medda, A., Shakil, S., Shen, X., Kashyap, A., Chen, S., . . . Keilholz, S. D. (2017). Instantaneous brain  
537 dynamics mapped to a continuous state space. *NeuroImage*, *162*, 344–352. Retrieved from  
538 <http://www.sciencedirect.com/science/article/pii/S1053811917306894>[https://](https://linkinghub.elsevier.com/retrieve/pii/S1053811917306894)  
539 [linkinghub.elsevier.com/retrieve/pii/S1053811917306894](https://linkinghub.elsevier.com/retrieve/pii/S1053811917306894) doi:  
540 10.1016/j.neuroimage.2017.08.042
- 541 Billings, J., Thompson, G., Pan, W.-J., Magnuson, M. E., Medda, A., & Keilholz, S. (2018). Disentangling Multispectral  
542 Functional Connectivity With Wavelets. *Frontiers in Neuroscience*, *12*, 812. Retrieved from  
543 <https://www.frontiersin.org/article/10.3389/fnins.2018.00812/full> doi:  
544 10.3389/fnins.2018.00812
- 545 Biswal, B., Zerrin Yetkin, F., Haughton, V. M., & Hyde, J. S. (1995). Functional connectivity in the motor cortex of resting  
546 human brain using echo-planar mri. *Magnetic Resonance in Medicine*, *34*(4), 537–541. Retrieved from  
547 <https://doi.org/10.1002/mrm.1910340409> doi: 10.1002/mrm.1910340409
- 548 Buckner, R. L. K. F. M. C. A. D. J. C. Y. B. T. T. (2011). The organization of the human cerebellum estimated by intrinsic  
549 functional connectivity. *Journal of Neurophysiology*, *106*(5), 2322–2345. Retrieved from  
550 <http://jn.physiology.org/content/106/5/2322.abstract>[http://jn.physiology.org/](http://jn.physiology.org/content/jn/106/5/2322.full.pdf)  
551 [content/jn/106/5/2322.full.pdf](http://jn.physiology.org/content/jn/106/5/2322.full.pdf)
- 552 Bullmore, E., & Sporns, O. (2009). Complex brain networks: graph theoretical analysis of structural and functional  
553 systems. *Nat Rev Neurosci*, *10*(3), 186–198. doi: 10.1038/nrn2575
- 554 Calhoun, V. D., Miller, R., Pearlson, G., & Adalı, T. (2014). The chronnectome: time-varying connectivity networks as the  
555 next frontier in fmri data discovery. *Neuron*, *84*(2), 262–274.
- 556 Carlsson, G. (2009). *Topology and Data* (Vol. 46; Tech. Rep. No. 2). Retrieved from [http://www.ams.org/](http://www.ams.org/journals/bull/2009-46-02/S0273-0979-09-01249-X/S0273-0979-09-01249-X.pdf)  
557 [journals/bull/2009-46-02/S0273-0979-09-01249-X/S0273-0979-09-01249-X.pdf](http://www.ams.org/journals/bull/2009-46-02/S0273-0979-09-01249-X/S0273-0979-09-01249-X.pdf)
- 558 Carrì, M., Cuturi, M., & Oudot, S. (n.d.). *Sliced Wasserstein Kernel for Persistence Diagrams* (Tech. Rep.). Retrieved from  
559 <https://arxiv.org/pdf/1706.03358.pdf>

- 560 Chaudhuri, R., Gerçek, B., Pandey, B., Peyrache, A., & Fiete, I. (2019). The intrinsic attractor manifold and population  
561 dynamics of a canonical cognitive circuit across waking and sleep. *Nature Neuroscience*, 22(9), 1512–1520. Retrieved  
562 from <https://doi.org/10.1038/s41593-019-0460-x> doi: 10.1038/s41593-019-0460-x
- 563 Chung, M. K., Lee, H., Di Christofano, A., Ombao, H., & Solo, V. (2019). Exact topological inference of the resting-state  
564 brain networks in twins. *Network Neuroscience*, 3(3), 674–694. Retrieved from  
565 [https://www.mitpressjournals.org/doi/abs/10.1162/netn\\_{\\_}a\\_{\\_}00091](https://www.mitpressjournals.org/doi/abs/10.1162/netn_{_}a_{_}00091) doi:  
566 10.1162/netn\_a\_00091
- 567 Curto, C. (2017). What can topology tell us about the neural code? *Bulletin of the American Mathematical Society*, 54(1),  
568 63–78. Retrieved from <https://arxiv.org/pdf/1605.01905.pdf> doi: 10.1090/bull/1554
- 569 Dabaghian, Y., Brandt, V. L., & Frank, L. M. (2014). Reconceiving the hippocampal map as a topological template. *eLife*,  
570 3, e03476. doi: 10.7554/eLife.03476
- 571 Damoiseaux, J. S., & Greicius, M. D. (2009). Greater than the sum of its parts: a review of studies combining structural  
572 connectivity and resting-state functional connectivity. *Brain Structure and Function*, 213(6), 525–533.
- 573 De Silva, V., Morozov, D., & Vejdemo-Johansson, M. (2011). *Dualities in persistent (co)homology* (Vol. 27; Tech. Rep.  
574 No. 12). Retrieved from  
575 <https://www.mrzv.org/publications/dualities-persistence/manuscript/> doi:  
576 10.1088/0266-5611/27/12/124003
- 577 Duman, A. N., Tatar, A. E., Pirim, H., Duman, A. N., Tatar, A. E., & Pirim, H. (2019). Uncovering Dynamic Brain  
578 Reconfiguration in MEG Working Memory n-Back Task Using Topological Data Analysis. *Brain Sciences*, 9(6), 144.  
579 Retrieved from <https://www.mdpi.com/2076-3425/9/6/144> doi: 10.3390/brainsci9060144
- 580 Edelsbrunner, H., Letscher, D., & Zomorodian, A. (2002). Topological persistence and simplification. *Discrete and*  
581 *Computational Geometry*, 28(4), 511–533. Retrieved from  
582 <http://link.springer.com/10.1007/s00454-002-2885-2> doi: 10.1007/s00454-002-2885-2
- 583 Farahani, F. V., Karwowski, W., & Lighthall, N. R. (2019). Application of Graph Theory for Identifying Connectivity  
584 Patterns in Human Brain Networks: A Systematic Review. *Frontiers in neuroscience*, 13, 585. Retrieved from  
585 <http://www.ncbi.nlm.nih.gov/pubmed/31249501><http://www.pubmedcentral.nih.gov/>

586 `articlerender.fcgi?artid=PMC6582769` doi: 10.3389/fnins.2019.00585

587 Farge, M., & Marie. (1992). Wavelet Transforms and their Applications to Turbulence. *Annual Review of Fluid Mechanics*,  
588 24(1), 395–458. Retrieved from

589 <http://www.annualreviews.org/doi/10.1146/annurev.fl.24.010192.002143> doi:  
590 10.1146/annurev.fl.24.010192.002143

591 Finn, E. S., Shen, X., Scheinost, D., Rosenberg, M. D., Huang, J., Chun, M. M., ... Constable, R. T. (2015). Functional  
592 connectome fingerprinting: identifying individuals using patterns of brain connectivity. *Nature neuroscience*, 18(11),  
593 1664–1671.

594 Giusti, C., Ghrist, R., & Bassett, D. S. (2016). Two's company, three (or more) is a simplex. *Journal of Computational  
595 Neuroscience*, 41(1), 1–14.

596 Giusti, C., Pastalkova, E., Curto, C., & Itskov, V. (2015). Clique topology reveals intrinsic geometric structure in neural  
597 correlations. *Proceedings of the National Academy of Sciences*, 112(44), 13455–13460. Retrieved from  
598 <http://arxiv.org/abs/1502.06172> [http://dx.doi.org/10.1073/](http://dx.doi.org/10.1073/pnas.1506407112)  
599 [pnas.1506407112](http://www.pnas.org/lookup/doi/10.1073/pnas.1506407112) <http://www.pnas.org/lookup/doi/10.1073/pnas.1506407112> doi:  
600 10.1073/pnas.1506407112

601 Glasser, M. F., Coalson, T. S., Robinson, E. C., Hacker, C. D., Harwell, J., Yacoub, E., ... Van Essen, D. C. (2016). A  
602 multi-modal parcellation of human cerebral cortex. *Nature*, 536(7615), 171–178. Retrieved from  
603 <http://www.ncbi.nlm.nih.gov/pubmed/27437579> [http://www.pubmedcentral.nih.gov/](http://www.pubmedcentral.nih.gov/articlerender.fcgi?artid=PMC4990127)  
604 <http://www.nature.com/articles/nature18933> doi:  
605 10.1038/nature18933

606 Gonzalez-Castillo, J., Hoy, C. W., Handwerker, D. A., Robinson, M. E., Buchanan, L. C., Saad, Z. S., & Bandettini, P. A.  
607 (2015). Tracking ongoing cognition in individuals using brief, whole-brain functional connectivity patterns. *Proceedings  
608 of the National Academy of Sciences of the United States of America*, 112(28), 8762–7. Retrieved from  
609 <http://www.ncbi.nlm.nih.gov/pubmed/26124112> [http://www.pubmedcentral.nih.gov/](http://www.pubmedcentral.nih.gov/articlerender.fcgi?artid=PMC4507216)  
610 [articlerender.fcgi?artid=PMC4507216](http://www.pubmedcentral.nih.gov/articlerender.fcgi?artid=PMC4507216) doi: 10.1073/pnas.1501242112

611 Gordon, E. M., Laumann, T. O., Adeyemo, B., Huckins, J. F., Kelley, W. M., & Petersen, S. E. (2016). Generation and  
612 Evaluation of a Cortical Area Parcellation from Resting-State Correlations. *Cerebral cortex (New York, N.Y. : 1991)*,

- 613 26(1), 288–303. Retrieved from <http://www.ncbi.nlm.nih.gov/pubmed/25316338>[http://](http://www.ncbi.nlm.nih.gov/pubmed/25316338)
- 614 [www.ncbi.nlm.nih.gov/pubmed/25316338](http://www.ncbi.nlm.nih.gov/pubmed/25316338)[http://](http://www.ncbi.nlm.nih.gov/pubmed/25316338)
- 615 [www.ncbi.nlm.nih.gov/pubmed/25316338](http://www.ncbi.nlm.nih.gov/pubmed/25316338)[http://](http://www.ncbi.nlm.nih.gov/pubmed/25316338)
- 616 [www.ncbi.nlm.nih.gov/pubmed/25316338](http://www.ncbi.nlm.nih.gov/pubmed/25316338)[http://](http://www.ncbi.nlm.nih.gov/pubmed/25316338)
- 617 [www.ncbi.nlm.nih.gov/pubmed/25316338](http://www.ncbi.nlm.nih.gov/pubmed/25316338)[http://](http://www.ncbi.nlm.nih.gov/pubmed/25316338)
- 618 [www.ncbi.nlm.nih.gov/pubmed/25316338](http://www.ncbi.nlm.nih.gov/pubmed/25316338)[http://](http://www.ncbi.nlm.nih.gov/pubmed/25316338)
- 619 [www.ncbi.nlm.nih.gov/pubmed/25316338](http://www.ncbi.nlm.nih.gov/pubmed/25316338)[http://](http://www.ncbi.nlm.nih.gov/pubmed/25316338)
- 620 [www.ncbi.nlm.nih.gov/pubmed/25316338](http://www.ncbi.nlm.nih.gov/pubmed/25316338)[http://](http://www.ncbi.nlm.nih.gov/pubmed/25316338)
- 621 [www.ncbi.nlm.nih.gov/pubmed/25316338](http://www.ncbi.nlm.nih.gov/pubmed/25316338)[http://](http://www.ncbi.nlm.nih.gov/pubmed/25316338)
- 622 [www.ncbi.nlm.nih.gov/pubmed/25316338](http://www.ncbi.nlm.nih.gov/pubmed/25316338)[http://](http://www.ncbi.nlm.nih.gov/pubmed/25316338)
- 623 [www.ncbi.nlm.nih.gov/pubmed/25316338](http://www.ncbi.nlm.nih.gov/pubmed/25316338)[http://](http://www.ncbi.nlm.nih.gov/pubmed/25316338)
- 624 [www.ncbi.nlm.nih.gov/pubmed/25316338](http://www.ncbi.nlm.nih.gov/pubmed/25316338)[http://](http://www.ncbi.nlm.nih.gov/pubmed/25316338)
- 625 [www.ncbi.nlm.nih.gov/pubmed/25316338](http://www.ncbi.nlm.nih.gov/pubmed/25316338)[http://](http://www.ncbi.nlm.nih.gov/pubmed/25316338)
- 626 [www.ncbi.nlm.nih.gov/pubmed/25316338](http://www.ncbi.nlm.nih.gov/pubmed/25316338)[http://](http://www.ncbi.nlm.nih.gov/pubmed/25316338)
- 627 [www.ncbi.nlm.nih.gov/pubmed/25316338](http://www.ncbi.nlm.nih.gov/pubmed/25316338)[http://](http://www.ncbi.nlm.nih.gov/pubmed/25316338)
- 628 [www.ncbi.nlm.nih.gov/pubmed/25316338](http://www.ncbi.nlm.nih.gov/pubmed/25316338)[http://](http://www.ncbi.nlm.nih.gov/pubmed/25316338)
- 629 [www.ncbi.nlm.nih.gov/pubmed/25316338](http://www.ncbi.nlm.nih.gov/pubmed/25316338)[http://](http://www.ncbi.nlm.nih.gov/pubmed/25316338)
- 630 [www.ncbi.nlm.nih.gov/pubmed/25316338](http://www.ncbi.nlm.nih.gov/pubmed/25316338)[http://](http://www.ncbi.nlm.nih.gov/pubmed/25316338)
- 631 [www.ncbi.nlm.nih.gov/pubmed/25316338](http://www.ncbi.nlm.nih.gov/pubmed/25316338)[http://](http://www.ncbi.nlm.nih.gov/pubmed/25316338)
- 632 [www.ncbi.nlm.nih.gov/pubmed/25316338](http://www.ncbi.nlm.nih.gov/pubmed/25316338)[http://](http://www.ncbi.nlm.nih.gov/pubmed/25316338)
- 633 [www.ncbi.nlm.nih.gov/pubmed/25316338](http://www.ncbi.nlm.nih.gov/pubmed/25316338)[http://](http://www.ncbi.nlm.nih.gov/pubmed/25316338)
- 634 [www.ncbi.nlm.nih.gov/pubmed/25316338](http://www.ncbi.nlm.nih.gov/pubmed/25316338)[http://](http://www.ncbi.nlm.nih.gov/pubmed/25316338)
- 635 [www.ncbi.nlm.nih.gov/pubmed/25316338](http://www.ncbi.nlm.nih.gov/pubmed/25316338)[http://](http://www.ncbi.nlm.nih.gov/pubmed/25316338)
- 636 [www.ncbi.nlm.nih.gov/pubmed/25316338](http://www.ncbi.nlm.nih.gov/pubmed/25316338)[http://](http://www.ncbi.nlm.nih.gov/pubmed/25316338)
- 637 [www.ncbi.nlm.nih.gov/pubmed/25316338](http://www.ncbi.nlm.nih.gov/pubmed/25316338)[http://](http://www.ncbi.nlm.nih.gov/pubmed/25316338)
- 638 [www.ncbi.nlm.nih.gov/pubmed/25316338](http://www.ncbi.nlm.nih.gov/pubmed/25316338)[http://](http://www.ncbi.nlm.nih.gov/pubmed/25316338)

- 639 Marwan, N., Thiel, M., & Nowaczyk, N. R. (2002). Application of the cross wavelet transform and wavelet coherence  
640 to geophysical time series. *Nonlinear Processes in Geophysics*, 9(3), 325–331. Retrieved from  
641 <http://sub3.isiknowledge.com/error/Error?PathInfo=/>  
642 <http://sub3.isiknowledge.com/error/Error?PathInfo=/%3Faction%3Dretrieve%26mode%3DFullRecord%26product%3DWOS%26UT%3D0001769>  
643 <http://sub3.isiknowledge.com/error/Error?PathInfo=/%3Faction%3Dretrieve%26mode%3DFullRecord%26product%3DWOS%26UT%3D0001769>  
644 <http://sub3.isiknowledge.com/error/Error?PathInfo=/%3Faction%3Dretrieve%26mode%3DFullRecord%26product%3DWOS%26UT%3D0001769> doi: 10.5194/npg-11-515-2004
- 645 McInnes, L., Healy, J., & Melville, J. (2020). *Umap: Uniform manifold approximation and projection for dimension*  
646 *reduction*.
- 647 Mileyko, Y., Mukherjee, S., & Harer, J. (2011). Probability measures on the space of persistence diagrams. *Inverse*  
648 *Problems*, 27(12), 124007. Retrieved from  
649 <https://iopscience.iop.org/article/10.1088/0266-5611/27/12/124007> doi:  
650 10.1088/0266-5611/27/12/124007
- 651 Patania, A., Vaccarino, F., & Petri, G. (2017). Topological analysis of data. *EPJ Data Science*, 6, 1–6.
- 652 Petri, G., Expert, P., Turkheimer, F., Carhart-Harris, R., Nutt, D., Hellyer, P. J., & Vaccarino, F. (2014a). Homological  
653 scaffolds of brain functional networks. *Journal of The Royal Society Interface*, 11(101), 20140873.
- 654 Petri, G., Expert, P., Turkheimer, F., Carhart-Harris, R., Nutt, D., Hellyer, P. J., & Vaccarino, F. (2014b). Homological  
655 scaffolds of brain functional networks. *Journal of The Royal Society Interface*, 11(101), 20140873–20140873. Retrieved  
656 from  
657 <http://dx.doi.org/10.1098/rsif.2014.0873> or via [http://rsif.royalsocietypublishing](http://rsif.royalsocietypublishing.org)  
658 <http://rsif.royalsocietypublishing.org/cgi/doi/10.1098/rsif.2014.0873> doi:  
659 10.1098/rsif.2014.0873
- 660 Petri, G., Scolamiero, M., Donato, I., & Vaccarino, F. (2013). Topological strata of weighted complex networks. *PloS one*,  
661 8(6).
- 662 Phinyomark, A., Ibanez-Marcelo, E., & Petri, G. (2017). Resting-state fmri functional connectivity: Big data preprocessing  
663 pipelines and topological data analysis. *IEEE Transactions on Big Data*, 3(4), 415–428.



- 664 Rasetti, M. (2017). The ‘Life Machine’: A Quantum Metaphor for Living Matter. *International Journal of Theoretical*  
665 *Physics*, 56(1), 145–167. doi: 10.1007/s10773-016-3177-6
- 666 Reimann, M. W., Nolte, M., Scolamiero, M., Turner, K., Perin, R., Chindemi, G., ... Markram, H. (2017). Cliques of  
667 Neurons Bound into Cavities Provide a Missing Link between Structure and Function. *Frontiers in Computational*  
668 *Neuroscience*, 11, 48. Retrieved from  
669 <http://journal.frontiersin.org/article/10.3389/fncom.2017.00048/full><https://www.frontiersin.org/articles/10.3389/fncom.2017.00048/full> doi: 10.3389/fncom.2017.00048
- 671 Saggar, M., Sporns, O., Gonzalez-Castillo, J., Bandettini, P. A., Carlsson, G., Glover, G., & Reiss, A. L. (2018). Towards a  
672 new approach to reveal dynamical organization of the brain using topological data analysis. *Nature Communications*,  
673 9(1). Retrieved from [www.nature.com/naturecommunications](http://www.nature.com/naturecommunications) doi: 10.1038/s41467-018-03664-4
- 674 Sizemore, A., Giusti, C., & Bassett, D. S. (2017). Classification of weighted networks through mesoscale homological  
675 features. *Journal of Complex Networks*, 5(2), 245–273.
- 676 Sizemore, A. E., Giusti, C., Kahn, A., Vettel, J. M., Betzel, R. F., & Bassett, D. S. (2018). Cliques and cavities in the human  
677 connectome. *Journal of Computational Neuroscience*, 44(1), 115–145. Retrieved from  
678 <https://arxiv.org/pdf/1608.03520.pdf> doi: 10.1007/s10827-017-0672-6
- 679 Sizemore, A. E., Phillips-Cremins, J. E., Ghrist, R., & Bassett, D. S. (2019). The importance of the whole: Topological data  
680 analysis for the network neuroscientist. *Network Neuroscience*, 3(3), 656–673. Retrieved from  
681 <https://doi.org/10.1162/netn.a.00073> doi: 10.1162/netn.a.00073
- 682 Smith, S. M., Fox, P. T., Miller, K. L., Glahn, D. C., Fox, P. M., Mackay, C. E., ... Beckmann, C. F. (2009).  
683 Correspondence of the brain’s functional architecture during activation and rest. *Proceedings of the National Academy of*  
684 *Sciences*. Retrieved from [http://www.pnas.org/content/early/2009/07/17/](http://www.pnas.org/content/early/2009/07/17/0905267106.abstract)  
685 [0905267106.abstract](http://www.pnas.org/content/106/31/13040.full.pdf)<http://www.pnas.org/content/106/31/13040.full.pdf> doi:  
686 10.1073/pnas.0905267106
- 687 Stolz, B. (2014). *Computational Topology in Neuroscience* (Doctoral dissertation). Retrieved from  
688 <https://pdfs.semanticscholar.org/62b0/f4a74b73c9dd3948a63189d2b3f3cfc7185d.pdf>
- 689 Stoodley, C. J., Valera, E. M., & Schmahmann, J. D. (2010). An fMRI study of intra-individual functional topography in the

- 690 human cerebellum. *Behavioural Neurology*, 23(1-2), 65–79. Retrieved from  
691 <https://pubmed.ncbi.nlm.nih.gov/20714062/> doi: 10.3233/BEN-2010-0268
- 692 Thompson, W. H., & Fransson, P. (2015). The frequency dimension of fMRI dynamic connectivity: Network connectivity,  
693 functional hubs and integration in the resting brain. *Neuroimage*, 121, 227–242. doi: 10.1016/j.neuroimage.2015.07.022
- 694 Torrence, C., Compo, G. P., Torrence, C., & Compo, G. P. (1998). A Practical Guide to Wavelet Analysis. *Bulletin of the*  
695 *American Meteorological Society*, 79(1), 61–78. Retrieved from [http://journals.ametsoc.org/doi/abs/](http://journals.ametsoc.org/doi/abs/10.1175/1520-0477(1998)079;0061:APGTWA;2.0.CO;2)  
696 [10.1175/1520-0477\(1998\)079;0061:APGTWA;2.0.CO;2](http://journals.ametsoc.org/doi/abs/10.1175/1520-0477(1998)079;0061:APGTWA;2.0.CO;2) doi:  
697 [10.1175/1520-0477\(1998\)079;0061:APGTWA;2.0.CO;2](http://journals.ametsoc.org/doi/abs/10.1175/1520-0477(1998)079;0061:APGTWA;2.0.CO;2)
- 698 Torrence, C., Webster, P. J., Torrence, C., & Webster, P. J. (1999). Interdecadal Changes in the ENSO–Monsoon System.  
699 *Journal of Climate*, 12(8), 2679–2690. Retrieved from [http://journals.ametsoc.org/doi/abs/10.1175/](http://journals.ametsoc.org/doi/abs/10.1175/1520-0442(1999)012;2679:ICITEM;2.0.CO;2)  
700 [1520-0442\(1999\)012;2679:ICITEM;2.0.CO;2](http://journals.ametsoc.org/doi/abs/10.1175/1520-0442(1999)012;2679:ICITEM;2.0.CO;2) doi:  
701 [10.1175/1520-0442\(1999\)012;2679:ICITEM;2.0.CO;2](http://journals.ametsoc.org/doi/abs/10.1175/1520-0442(1999)012;2679:ICITEM;2.0.CO;2)
- 702 Tralie, C., Saul, N., & Bar-On, R. (2018). Ripser.py: A lean persistent homology library for python. *The Journal of Open*  
703 *Source Software*, 3(29), 925. Retrieved from <https://doi.org/10.21105/joss.00925> doi:  
704 [10.21105/joss.00925](https://doi.org/10.21105/joss.00925)
- 705 Yoo, J., Kim, E. Y., Ahn, Y. M., & Ye, J. C. (2016). Topological persistence vineyard for dynamic functional brain  
706 connectivity during resting and gaming stages. *Journal of Neuroscience Methods*, 267, 1–13. doi:  
707 [10.1016/j.jneumeth.2016.04.001](https://doi.org/10.1016/j.jneumeth.2016.04.001)

## SUPPORTING INFORMATION

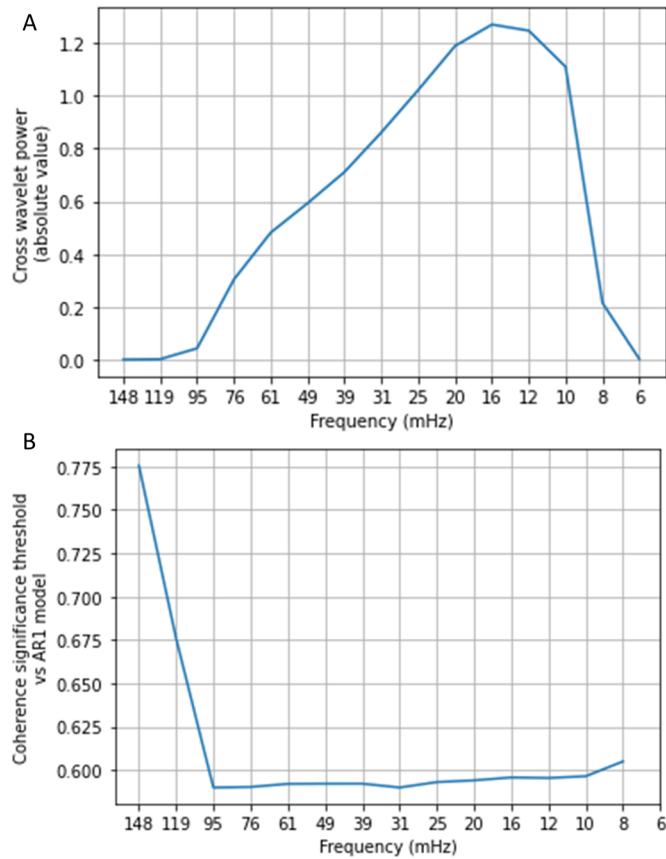

Figure 0.1: **Describes the mean values of the input data across frequency bands.** Part A of the figure displays the absolute value of the mean cross wavelet power. Frequencies between 0.01 and 0.02 Hz are most likely to contribute to the mean wavelet coherence used to quantify TVFC edges. Part B of the figure displays a significance threshold level indicating significantly high coherence. The threshold was calculated as an average against the background power spectrum. A distribution over the background power spectrum was calculated from 300 lag-1 approximations of each time series. Following Torrence et al. (1998), the 95% confidence interval is the product of the background power spectrum and the 95th percentile value of a chi-squared distribution with two degrees of freedom.

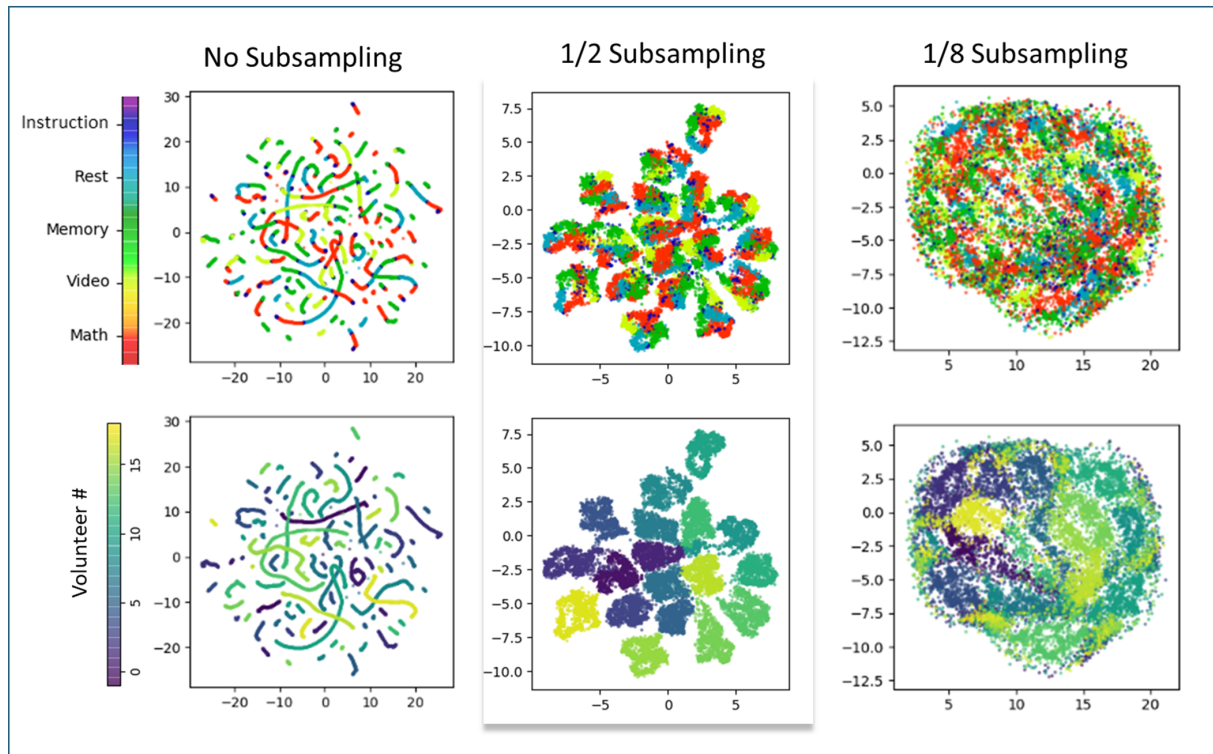

Figure 0.2: **Observes an embedding of the weighted Jaccard distance between edges at several levels of subsampling.** With no subsampling, successive time points from within the same scan retain strong attractive forces in the UMAP nearest-neighbor embedding. This produces string-like masses. Subsampling the data by half retains the similarities present within each volunteer’s scan, thereby grouping volunteers into their own cluster. A noticeable degree of volunteerwise clustering—e.g., temporal self-similarity—is still present when seeding the embedding with 1/8 the total number of data points. Nonetheless, some mutual attraction does emerge among edge-centric brain states measured across multiple volunteers.
